# Supplementary material
Source: publisher site journal article supplement (https://www.dovepress.com/article/278912)
Supplement: Supplementary file 1 [file get_supplementary_file.php]

**Supplement Table 1** The expression of circ_0130911 in the circRNA high-throughput sequencing

| Gene symbol | C1-1 | C1-2 | C1-3 | C2-1 | C2-2 | C2-3 |
| --- | --- | --- | --- | --- | --- | --- |
| circ_0130911  expression | 5.570669 | 5.938821 | 8.348225 | 0 | 0 | 6.391276 |

C1, early recurrence HCC tissues; C2, early recurrence-free HCC tissues.
